# Supplementary material for: S100A8 and S100A9, both transcriptionally regulated by PU.1, promote epithelial-mesenchymal transformation (EMT) and invasive growth of dermal keratinocytes during scar formation post burn
Source: publisher site journal article supplement (doi:10.18632/aging.203112), 2021-06-07
Supplement: Supplementary file [file aging-v13i11-203112-supplementary-material-SD1.pdf]

**SUPPLEMENTARY FIGURES**

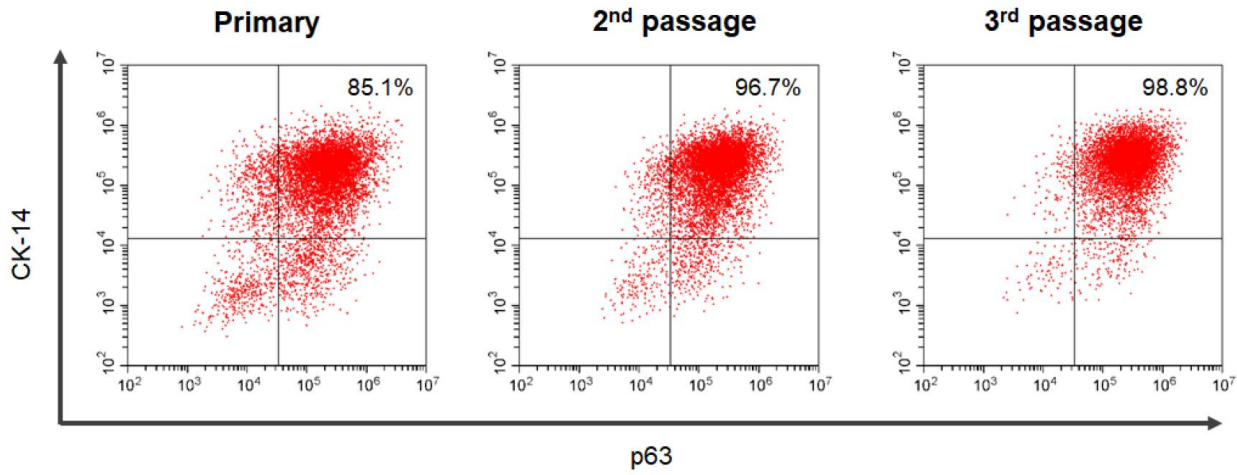

**Supplementary Figure 1.** Dual fluorescent antibodies, specific surface marker proteins cytokeratin-14 (CK-14) and p63, were used to label the keratinocytes, and FACS was used to verify the purity of isolated primary keratinocytes, the 2<sup>nd</sup> passage, and the 3<sup>rd</sup> passage.

**A**

**s100a8 promoter sequence (-999~+1):**

```

CTGGGCTTCAGCTTCTCGTCTGTACATTGGCTGGTTCAGCTCTCTGCCT
TCCTGAGAAGCATATTATGAAGCTTTTGTAAAGATAATGTGGATGAAACCC
ACCCATATGAGAAATACTCCATAGACCTCTATAAACTGGCAGCCAGTTAA
TTCGAGTGGTATTCTACTGGGCTGGGGATTGCACCTATGAATTCTCGGG
AATAAGCCCTCTTCTTTTCCCTTGGGCATGAGACTCACATGGACTCTC
CAAATACTTGACCCCTCACCTCTAGAGTTCACCTCTCTCTTCATCCC
AGGCTCTGGGACAAAGGTACAGTGACCATTCTGAGAGGCTGAAAGGGT
CTCTACTGTTATCATGCAGTACTTAGTGGCAGCTGAGGGTGGACAGAAT
GAAGACCAGGAATTACATCCAAGACTCAGGACATCCTTAGCTTTTAGAG
CAGAATGACCATTAAGAGTACGGGCAGGTTAGGAATTTGTCCAACCTTT
GGGAATACAGCTATCTCCAAGACTGTACTACCCATCTAAATAGAACC
CCATAGCAGTACTCCAACCTTACTAATATCCAGTAGCTAGAACCAGCAA
TGTTTCTGAGGCTTTTGGTACTTTGAGAACTTGAGAAAGTTGCTTTTCT
ATGCACCCACACTCATACAGAAGCATACACCTTCAGTTCAGTTCAGTTCA
GTTTCAGTTCAGTTCAGTTCAGTTCAGTTCAGTTCAGTTCAGAGGTAGACT
GGACATGAAGGCATTGGATCAGCAATGGATCCAATTAGGAGAGGGTTAAG
ATTGAGAGTCTGTTTATGATGCAGGGATGAGGTGCCAGGGCCTAGACATG
GACTTATTGCCATGCCCATCTCTGATTCTTCCTGCTGGGTACTCTGTCT
GGTAAATGTTCCAACACTCCCACTTCCTCAGACTCAGAAATGCTCACTGT
ACTCAGTGATTGCCACATGGACTTGGTATAGGAAACAGAGGCTGTGGCAAC
    
```

-79  
PU.1 binding motif

**B**

**s100a9 promoter sequence (-999~+1):**

```

AGAAAATGCAAGCAAAGTAAGGGCTGAGGGTGAACCCCTTGATGCCCAGC
CCGCTGCCCTGCCAGGCTACTAAAAGAAACATTGCTTTCTGATGCATGTG
TAAAGGGTGACTTAATTAACCCCTGCCCCAGGAAAGGATGTGAAAAAAG
ACTATCAGAGAGGTACAAGGAGAAAAGAGGAATAGAGAGATGGGATAAGA
AAAGAAAATAGAAGGAAATTTTATCAAAAATATATTATGAAAGTCAT
TGTCTGTTTGTGTTTATAGGCTAATAACAATCATTTTTTTTAAATCAGC
TACCTTCTAGGATATAAGTCTAGGGACATAAATGACAACCTGGGAATA
GGATTGGAAGAGTGACACTGAGAACCCTGAAGATAGCTCCCTCTCAG
ATGCAAGGGGAGAATGTAGTAGTAAATACCCTTAAAAAGAACTGGGATG
TCTGAGTACAGCCCTGCTAGGTCACATGCTAGCTAAATGATCTTAAGTC
CCCTTCTGAACATAACATTCCTCTCCATTGGGAAAGAGCTACCACCTCTG
AGGAGCTTCTTAACACTAATCCATTCAAGAACCCATGAGGACCCCTC
ACCCTTCTCAAAGGAGCCAGGAAAACACATGAGAAGGCTCAGACCATAA
ACTCAGGGGATAGGCCAGAATGAGATGGCCACAATGATTTCGCCTGCCAC
CCTCTGTATATTACAAGTCAGGACAAGGAAATGAAAGGTATCAAAGATGG
CAGGTAGGCTGTCTTGCTTAAGATTTGGGCGGGGAGGGTTAGGGGGAGG
TTGGATGGAAGGGAAGTCAGCCAACTAACCCAGTTTCCCCCAACAAGCT
CCAAGCCAGGGCTGGGAAATTCAAAAACATCAGAGCTGTGTGAACATT
TCCTGCCCCACCCAGCTCCCTGACTGTCAGAGTTACCACACTGCTCACC
TGTAAGCAATCTTCCCGAGATAACCATGTATCTAACAAGGAGCTGCCT
    
```

-193  
PU.1 binding motif

**Supplementary Figure 2.** Sequence analysis for the promoter region of s100a8 and s100a9 genes. (A) The position of PU.1 binding motif at s100a8 promoter region; (B) The position of PU.1 binding motif at s100a9 promoter region.
